# Supplementary material for: Evaluation of the Effectiveness of Xanthine Oxidoreductase Inhibitors on Haemodialysis Patients using a Marginal Structural Model
Source: PubMed Central journal article supplement (PMC5656650; doi:10.1038/s41598-017-13970-4), 2017-10-25
Supplement: 41598_2017_13970_MOESM1_ESM.pdf [file 41598_2017_13970_MOESM1_ESM.pdf]

## Supplementary Information

### Evaluation of the Effectiveness of Xanthine Oxidoreductase Inhibitors on Haemodialysis Patients using a Marginal Structural Model

Takeo Ishii<sup>1,2,\*</sup>, Masataka Taguri<sup>3</sup>, Kouichi Tamura<sup>2,\*</sup>, and Kunio Oyama<sup>1</sup>

<sup>1</sup> Department of Internal Medicine, Yokohama City, Yokohama-Daiichi Hospital, Yokohama 220-0011, Japan

<sup>2</sup> Department of Medical Science and Cardiorenal Medicine, Yokohama City University Graduate School of Medicine, Yokohama 236-0004, Japan

<sup>3</sup> Department of Biostatistics, Yokohama City University Graduate School of Medicine, Yokohama 236-0004, Japan

#### \*Corresponding authors

Takeo Ishii

Department of Internal Medicine, Yokohama Daiichi Hospital,  
2-5-15 Takashima, Nishi-ku, Yokohama 220-0011, Japan

E-mail: takeo.ishii@grp.zenjinkai.or.jp

Kouichi Tamura

Department of Medical Science and Cardiorenal Medicine, Yokohama City University  
Graduate School of Medicine,

3-9 Fukuura, Kanazawa-ku, Yokohama 236-0004, Japan

E-mail: tamukou@med.yokohama-cu.ac.jp

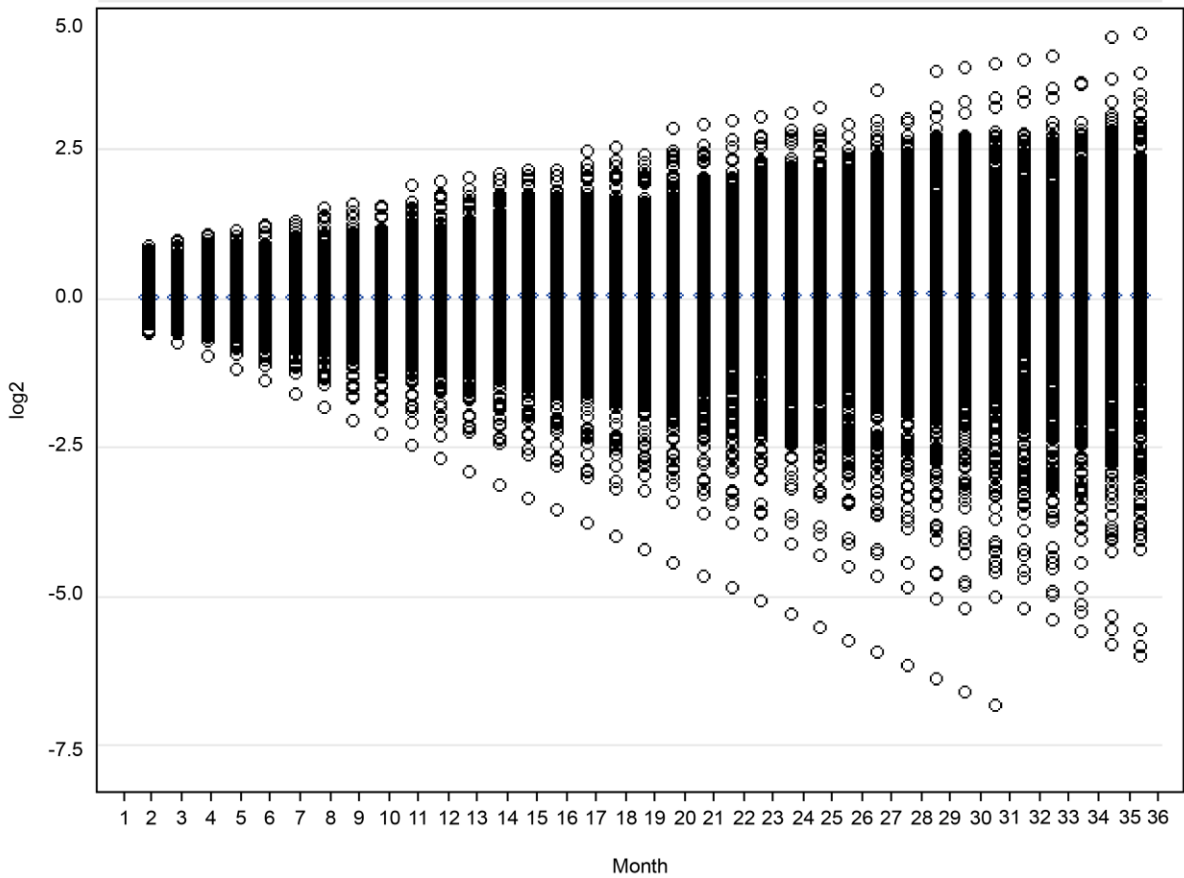

**Supplementary Figure S1.** Distribution of Stabilized Weights. After the denominator was created ( $1/ps\_pred\_n\_$ ,  $1/(1-ps\_pred\_n\_)$ ) and the numerator was created ( $ps\_pred\_n\_$ ,  $1-ps\_pred\_n\_$ ), the distribution of the Stabilized Weight in this figure was created for 36 months of data. The numerator and  $1/denominator$  were multiplied to calculate the stabilized weight ( $numerator/denominator$ ). Stabilized Weights were calculated into  $\log_2$  in this figure.

**Supplementary Table S1.** Cox Hazard Analysis for New-Onset CVD events

| Parameter                               | Hazard Ratio | SE    | p    | 95% CI      |             | *: p<0.05 |
|-----------------------------------------|--------------|-------|------|-------------|-------------|-----------|
|                                         |              |       |      | Lower Limit | Upper Limit |           |
| <b>Baseline</b>                         |              |       |      |             |             |           |
| Age (y)                                 | 1.00         | 0.001 | 0.41 | 1.00        | 1.00        |           |
| BMI (kg/m <sup>2</sup> )                | 1.00         | 0.003 | 0.47 | 0.99        | 1.00        |           |
| Sex, male n (%)                         | 0.99         | 0.028 | 0.70 | 0.94        | 1.05        |           |
| DM, yes n (%)                           | 1.07         | 0.024 | 0.00 | 1.02        | 1.12        | *         |
| XORi, yes n (%)                         | 1.02         | 0.027 | 0.37 | 0.97        | 1.08        |           |
| HD vintage (m)                          | 1.00         | 0.000 | 0.42 | 1.00        | 1.00        |           |
| <b>Baseline Serological Parameters</b>  |              |       |      |             |             |           |
| Hb (g/dL)                               | 1.01         | 0.010 | 0.49 | 0.99        | 1.03        |           |
| Fe (µg/dL)                              | 1.00         | 0.000 | 0.68 | 1.00        | 1.00        |           |
| Ferritin (ng/mL)                        | 1.00         | 0.000 | 0.29 | 1.00        | 1.00        |           |
| BUN (mg/dL)                             | 1.00         | 0.002 | 0.69 | 1.00        | 1.00        |           |
| UA (mg/dL)                              | 1.00         | 0.009 | 0.98 | 0.98        | 1.02        |           |
| Cr (g/dL)                               | 0.99         | 0.011 | 0.21 | 0.96        | 1.01        |           |
| Na (mEq/L)                              | 1.00         | 0.004 | 0.76 | 0.99        | 1.01        |           |
| Pi (mg/dL)                              | 1.01         | 0.010 | 0.38 | 0.99        | 1.03        |           |
| Intact PTH (pg/mL)                      | 1.00         | 0.000 | 0.50 | 1.00        | 1.00        |           |
| Alb (g/mL)                              | 1.01         | 0.034 | 0.82 | 0.94        | 1.08        |           |
| B2MG (mg/dL)                            | 1.00         | 0.002 | 0.37 | 1.00        | 1.01        |           |
| TC (mg/dL)                              | 1.00         | 0.000 | 0.25 | 1.00        | 1.00        |           |
| LDL (mg/dL)                             | 1.00         | 0.001 | 0.58 | 1.00        | 1.00        |           |
| HDL(mg/dL)                              | 1.00         | 0.001 | 0.41 | 1.00        | 1.00        |           |
| CGR (%)                                 | 1.00         | 0.001 | 0.34 | 1.00        | 1.00        |           |
| <b>Haemodialysis Related Parameters</b> |              |       |      |             |             |           |
| Delta BW (kg/HD)                        | 1.00         | 0.012 | 0.96 | 0.98        | 1.02        |           |
| SBP (mmHg)                              | 1.00         | 0.000 | 0.02 | 1.00        | 1.00        | *         |
| nPCR (g/kg/day)                         | 1.13         | 0.159 | 0.46 | 0.82        | 1.54        |           |
| KT/V                                    | 0.93         | 0.045 | 0.10 | 0.85        | 1.01        |           |
| Heart Rate(bpm)                         | 1.00         | 0.001 | 0.38 | 1.00        | 1.00        |           |
| <b>Comorbidity at Baseline</b>          |              |       |      |             |             |           |

|                              |      |       |      |      |      |   |
|------------------------------|------|-------|------|------|------|---|
| Infection and parasite       | 1.03 | 0.025 | 0.20 | 0.98 | 1.08 |   |
| Neoplasms                    | 1.00 | 0.050 | 0.97 | 0.91 | 1.11 |   |
| Endocrine metabolic disorder | 1.08 | 0.116 | 0.52 | 0.86 | 1.35 |   |
| Mental disorder              | 1.01 | 0.031 | 0.71 | 0.95 | 1.08 |   |
| Nervous system disorder      | 1.02 | 0.025 | 0.41 | 0.97 | 1.07 |   |
| Eye/ear                      | 1.00 | 0.025 | 0.95 | 0.95 | 1.05 |   |
| CVD complications (baseline) | 0.90 | 0.067 | 0.10 | 0.79 | 1.02 |   |
| Respiratory system           | 1.02 | 0.051 | 0.66 | 0.93 | 1.13 |   |
| Digestive system             | 1.01 | 0.082 | 0.90 | 0.86 | 1.19 |   |
| Skin disorder                | 1.01 | 0.033 | 0.80 | 0.95 | 1.08 |   |
| Musculoskeletal              | 1.06 | 0.027 | 0.03 | 1.01 | 1.12 | * |
| PCKD and congenital disease  | 1.02 | 0.034 | 0.52 | 0.96 | 1.09 |   |
| Injury                       | 1.05 | 0.025 | 0.03 | 1.00 | 1.11 | * |

Legend:

Baseline DM had a risk for new-onset CVD events (HR 1.072), SBP (HR 0.999), musculoskeletal complication (HR 1.060), and injury complications (HR 1.054).

CVD complications (baseline) included heart failure, hypertension, ischaemic heart disease, pulmonary heart diseases, Af and valvular diseases, cerebrovascular diseases, diseases of the arteries, diseases of the veins, hypotension, and others.

Mental disorder and endocrine metabolic disorder were omitted from the analysis.

Endocrine/metabolic disorder and mental disorder were omitted from the analysis.

**Supplementary Table S2.** In the IPTW analysis, logistic regression for treatment, ps\_pred for denominator and numerator.

| <b>Parameter<br/>&lt;denominator&gt;</b> | <b>Estimate</b> | <b>SE</b> | <b>p</b> |
|------------------------------------------|-----------------|-----------|----------|
| Baseline XORi, yes n                     | 19.48           | 135.8     | 0.89     |
| Sex, male n                              | 0.01            | 0.052     | 0.79     |
| Age (y)                                  | -0.01           | 0.002     | 0.00     |
| BMI (kg/m <sup>2</sup> )                 | 0.01            | 0.006     | 0.01     |
| HD vintage (m)                           | 0.00            | 0.000     | 0.40     |
| DM yes n                                 | -0.08           | 0.045     | 0.07     |
| <b>Baseline complications</b>            |                 |           |          |
| Infection and parasites                  | -0.06           | 0.043     | 0.15     |
| Neoplasms                                | -0.15           | 0.092     | 0.09     |
| Endocrine metabolic disorder             | -0.57           | 0.163     | 0.00     |
| Mental disorder                          | -0.12           | 0.050     | 0.02     |
| Nervous system disorder                  | -0.12           | 0.044     | 0.01     |
| Eye/ear                                  | 0.10            | 0.043     | 0.02     |
| <b>Baseline CVD Complications</b>        |                 |           |          |
| Heart Failure                            | -0.06           | 0.051     | 0.23     |
| Hypertension                             | 0.08            | 0.060     | 0.19     |
| Ischaemic Heart Disease                  | 0.06            | 0.044     | 0.19     |
| Pulmonary Heart Diseases                 | -0.13           | 2425.100  | 1.00     |
| Af and Vulvular Disases                  | -0.02           | 0.070     | 0.75     |
| Cerebrovascular Diseases                 | 0.06            | 0.060     | 0.32     |
| Diseases of the Arteries                 | -0.02           | 0.049     | 0.70     |
| Diseases of the Veins                    | 0.38            | 0.090     | <.0001   |
| Hypotension and Others                   | -0.19           | 0.085     | 0.02     |
| Respiratory system                       | 0.21            | 0.104     | 0.04     |

| <b>Parameter<br/>&lt;numerator&gt;</b> | <b>Estimate</b> | <b>SE</b> | <b>p</b> |
|----------------------------------------|-----------------|-----------|----------|
| Baseline XORi, yes n                   | 19.53           | 136.7     | 0.8864   |
| lag_treatments                         | 3.22            | 0.0367    | <.0001   |
| Sex, male n                            | 0.06            | 0.0419    | 0.1892   |
| Age (y)                                | -0.01           | 0.00172   | <.0001   |
| BMI (kg/m <sup>2</sup> )               | 0.01            | 0.00525   | 0.0194   |
| HD vintage (m)                         | 0.00            | 0.000234  | 0.92     |
| DM yes n                               | -0.07           | 0.0418    | 0.0784   |
| Infection and parasite                 | -0.05           | 0.0421    | 0.2579   |
| Neoplasms                              | -0.16           | 0.0895    | 0.0771   |
| Endocrine metabolic disorder           | -0.67           | 0.1605    | <.0001   |
| Mental disorder                        | -0.13           | 0.0491    | 0.0089   |
| Nervous system disorder                | -0.12           | 0.0427    | 0.0047   |
| Eye/ear                                | 0.13            | 0.0416    | 0.0015   |
| <b>Baseline CVD Complications</b>      |                 |           |          |
| Heart Failure                          | -0.07           | 0.050     | 0.15     |
| Hypertension                           | 0.06            | 0.058     | 0.32     |
| Ischaemic Heart Disease                | 0.04            | 0.043     | 0.33     |
| Pulmonary Heart Diseases               | -0.04           | 2438.0    | 1.00     |
| Af and Vulvular Disases                | -0.04           | 0.067     | 0.51     |
| Cerebrovascular Diseases               | 0.06            | 0.059     | 0.28     |
| Diseases of the Arteries               | -0.01           | 0.048     | 0.68     |
| Diseases of the Veins                  | 0.40            | 0.089     | <.0001   |
| Hypotension and Others                 | -0.12           | 0.082     | 0.15     |
| Respiratory system                     | 0.26            | 0.103     | 0.01     |



All time non-dependent variables, except lag\_treatment, were added to the numerator covariate.

lag\_: previous observation

treatments: XORi use at each observation, and lag\_treatments were the XORi used at the previous observation.

**Supplementary Table S3.** Weight distribution

| <b>Weight</b>                        | <b>Median</b> | <b>1 percent point</b>     | <b>5 percent point</b> | <b>Lower Quartiles Point</b> | <b>Upper Quartiles Point</b> | <b>95 percent point</b> | <b>99 percent point</b> | <b>Inter quartile range</b> | <b>Mean</b>   | <b>SD</b>     | <b>Minimum</b>  | <b>Maximum</b> |
|--------------------------------------|---------------|----------------------------|------------------------|------------------------------|------------------------------|-------------------------|-------------------------|-----------------------------|---------------|---------------|-----------------|----------------|
| Numerator                            | 1.000000      | 0.000000<br>0008388<br>526 | 0.000003<br>880127     | 0.1237602                    | 1.000000                     | 1.000000                | 1.000000                | 0.8762398                   | 0.7087<br>436 | 0.434<br>8620 | 0.0000<br>000   | 1.000<br>000   |
| <b>Denominator</b>                   | 1.000000      | 0.000000<br>0003707<br>435 | 0.000003<br>469403     | 0.1130941                    | 1.000000                     | 1.000000                | 1.000000                | 0.8869058                   | 0.7089<br>389 | 0.435<br>1635 | 0.0000<br>000   | 1.000<br>000   |
| <b><i>STABILIZED<br/>_WEIGHT</i></b> | 1.000000      | 0.263064<br>5              | 0.695530<br>9          | 1.000000                     | 1.000000                     | 1.945860                | 3.628771                | 0.0000000<br>1000000        | 1.1145<br>57  | 0.583<br>1767 | 0.0088<br>91500 | 21.94<br>657   |

Legend: Weight (IPTW, ps\_weight) was created using the following formula: for patients treated with XOR<sub>i</sub>, ps\_weight = 1 / ps\_pred, otherwise 1 / (1 – ps\_pred)<sup>10,11</sup>. The ps\_weight was cumulatively multiplied by 36 visits, defined as the 1/denominator. The numerator was created with the same covariate as the numerator including previous XOR<sub>i</sub> treatment but without the time-dependent variables, which was created using the following formula: for patients treated with XOR<sub>i</sub>, ps\_weight = ps\_pred, otherwise (1 – ps\_pred)<sup>10,11</sup>. (Supplementary Table S2) as those used for the calculation to create the denominator with inversely, but XOR<sub>i</sub> treatment was in the calculation. The numerator was cumulatively multiplied by 36 times as was the denominator. The numerator and 1/denominator were multiplied to calculate the stabilized weight (numerator/denominator). Stabilised weight that was used to fit the outcome model of the MSM.
